# Supplementary material for: Prospective Evaluation over 15 Years of Six Breast Cancer Risk Models
Source: Cancers (Basel). 2021 Oct 16;13(20):5194. doi: 10.3390/cancers13205194 (PMC8534072; doi:10.3390/cancers13205194)
Supplement: Supplementary file 1 [file cancers-13-05194-s001.zip]

Archive with 4 entries (4 files):
- MCCS_Questionnaire_BASELINE.pdf
- MCCS_Questionnaire_FUP1.pdf
- MCCS_Questionnaire_FUP2.pdf
- Supplementary_Material_20210929_final.pdf
