# Supplementary material for: Prospective Evaluation over 15 Years of Six Breast Cancer Risk Models
Source: Cancers (Basel). 2021 Oct 16;13(20):5194. doi: 10.3390/cancers13205194 (PMC8534072; doi:10.3390/cancers13205194)
Supplement: Supplementary file 1 [file cancers-13-05194-s001.zip › MCCS_Questionnaire_BASELINE.pdf]

## ENGLISH LIFESTYLE QUESTIONNAIRE

### FIRSTLY SOME QUESTIONS ABOUT YOUR SOCIAL LIFE

1. Including yourself, how many people live in your household?

- ☐ 1
- ☐ 2
- ☐ 3 or 4
- ☐ 5 or more

2. Apart from those who live with you, how many relatives do you usually see at least once a month?

- ☐ none
- ☐ 1 or 2
- ☐ 3 to 4
- ☐ 5 to 9
- ☐ 10 or more

3. Excluding your relatives, how many friends do you have who you could visit at any time without an invitation?

- ☐ none
- ☐ 1 or 2
- ☐ 3 to 4
- ☐ 5 to 9
- ☐ 10 or more

4. How many hours a week, if any, do you spend involved in social activities outside your home or work? (e.g. ethnic clubs, work clubs, church groups or sporting groups and other community groups or regular social meetings with friends)?

- ☐ none
- ☐ 1 or 2
- ☐ 3 to 4
- ☐ 5 to 9
- ☐ 10 or more

### NOW I WOULD LIKE TO ASK YOU SOME QUESTIONS ABOUT YOUR BACKGROUND

5. What is the highest level of education you have completed?

- ☐ never attended school
- ☐ some primary school
- ☐ completed primary school
- ☐ some high/technical school
- ☐ completed high/technical school
- ☐ other qualification (eg. trade certificate)
- ☐ some study towards a tertiary degree or diploma
- ☐ completed tertiary degree or diploma

6. What is/was your usual occupation?

**NOW I WOULD LIKE TO ASK SOME QUESTIONS ABOUT YOUR FAMILY AND THEIR MEDICAL HISTORY**

7. Is your father living?

☐ yes ☐ no

8. How old is/was your father?

9. Is your mother living?

☐ yes ☐ no

10. How old is/was your mother?

11. Have any of these relatives had:

|              | Father                   | Mother                   | Brother                  | Sister                   | Son                      | Daughter                 |
|--------------|--------------------------|--------------------------|--------------------------|--------------------------|--------------------------|--------------------------|
| Heart Attack | <input type="checkbox"/> |
| Cancer       | <input type="checkbox"/> |
| Diabetes     | <input type="checkbox"/> |
| Stroke       | <input type="checkbox"/> |

12. How many brothers do/did you have?

13. How many sisters do/did you have?

14. How many children do you have?

15. Are you a twin?

☐ yes ☐ no

**NOW SOME QUESTIONS ABOUT YOUR HEALTH**

16. What was your weight when you were between 18 and 21 years of age?

17. What is the heaviest weight you have been? (*exclude pregnancy weight*)

18. At what age did you achieve your heaviest weight?

19. Over the last five years has your weight:

- ☐ increased by more than 5 kg (11 lbs)
- ☐ decreased by more than 5 kg (11 lbs)
- ☐ stayed much the same
- ☐ don't know

20. Has the doctor ever told you that you have had:

|                                                  | Yes                      | No                       | If yes, how old<br>were you? |
|--------------------------------------------------|--------------------------|--------------------------|------------------------------|
| Asthma or wheezy breathing                       | <input type="checkbox"/> | <input type="checkbox"/> | .....                        |
| If yes, do you take medications                  | <input type="checkbox"/> | <input type="checkbox"/> | .....                        |
| Angina                                           | <input type="checkbox"/> | <input type="checkbox"/> | .....                        |
| If yes, do you take medications                  | <input type="checkbox"/> | <input type="checkbox"/> | .....                        |
| Hypertension ( <i>high blood pressure</i> )      | <input type="checkbox"/> | <input type="checkbox"/> | .....                        |
| If yes, do you take tablets                      | <input type="checkbox"/> | <input type="checkbox"/> | .....                        |
| Diabetes mellitus ( <i>sugar diabetes</i> )      | <input type="checkbox"/> | <input type="checkbox"/> | .....                        |
| If yes, do you take insulin injections           | <input type="checkbox"/> | <input type="checkbox"/> | .....                        |
| do you take tablets                              | <input type="checkbox"/> | <input type="checkbox"/> | .....                        |
| Arthritis or rheumatism                          | <input type="checkbox"/> | <input type="checkbox"/> | .....                        |
| If yes, do you take aspirin?                     | <input type="checkbox"/> | <input type="checkbox"/> | .....                        |
| Cancer                                           | <input type="checkbox"/> | <input type="checkbox"/> | .....                        |
| If yes, what type of cancer                      |                          |                          | .....                        |
| Kidney stones                                    | <input type="checkbox"/> | <input type="checkbox"/> | .....                        |
| Gallstones                                       | <input type="checkbox"/> | <input type="checkbox"/> | .....                        |
| If yes, have you had<br>your gallbladder removed | <input type="checkbox"/> | <input type="checkbox"/> | .....                        |
| Heart attack                                     | <input type="checkbox"/> | <input type="checkbox"/> | .....                        |
| Stroke                                           | <input type="checkbox"/> | <input type="checkbox"/> | .....                        |

**NOW SOME QUESTIONS ABOUT YOUR HABITS THAT MAY AFFECT YOUR HEALTH.**

**MOST PEOPLE VARY IN THEIR HABITS THROUGH LIFE, I WOULD LIKE TO NOW ASK ABOUT YOUR CURRENT HABITS AND THEN GO BACKWARDS IN TIME ASKING YOU ABOUT YOUR HABITS AT VARIOUS AGES**

21. Have you ever smoked at least 7 cigarettes a week for at least a year?

☐ yes      ☐ no

➡ If NO, go to Q 29

22. How old were you when you first started smoking at least 7 cigarettes a week?

23. How many cigarettes do/did you smoke a day on average?

24. Do you now smoke at least 7 cigarettes a week?

☐ yes      ☐ no

25. If NO, at what age did you stop smoking at least 7 cigarettes a week?

26. Between the age you started and the age you stopped (*or now for current smokers*) have you not smoked for periods of at least a year?  
☐ yes ☐ no
27. If YES, for how many years altogether did you not smoke during this period?
28. So altogether you have smoked cigarettes for how many years?
29. Have you ever smoked at least seven cigars a week for at least a year?  
☐ yes ☐ no
30. Have you ever smoked at least seven pipes of tobacco a week for at least a year?  
☐ yes ☐ no
31. Have you ever drunk at least 12 alcoholic drinks in a year? (*sips and tastes don't count*)  
☐ yes ☐ no

*If NO, go to Q 86*

32. How old were you when you first drank at least 12 alcoholic drinks in a year? (*sips and tastes don't count*)
33. Between the ages of 10-14 did you drink beer ☐ yes ☐ no, wine ☐ yes ☐ no or drinks containing spirits ☐ yes ☐ no?  
*(If NO, to all three, go to Q41)*
34. How often did you drink beer?  
..... ☐ day ☐ week ☐ month ☐ year
35. When you drank beer how much did you drink on average?  
..... ☐ glasses ☐ pots ☐ cans ☐ stubbies ☐ bottles
36. How often did you drink wine?  
..... ☐ day ☐ week ☐ month ☐ year
37. When you drank wine how much did you drink on average?  
..... ☐ glasses ☐ bottles ☐ litres
38. How often did you drink drinks containing spirits?  
..... ☐ day ☐ week ☐ month ☐ year
39. When you drank drinks containing spirits, how many did you drink on average?  
..... ☐ glasses

40. Between the ages of 10-14, what was the most alcoholic drinks that you consumed on any one occasion?

.....

41. Between the ages of 15-19 did you drink beer ☐ yes ☐ no, wine ☐ yes ☐ no or drinks containing spirits ☐ yes ☐ no?

*(IF NO, to all three, go to Q49)*

42. How often did you drink beer?

..... ☐ day ☐ week ☐ month ☐ year

43. When you drank beer how much did you drink on average?

..... ☐ glasses ☐ pots ☐ cans ☐ stubbies ☐ bottles

44. How often did you drink wine?

..... ☐ day ☐ week ☐ month ☐ year

45. When you drank wine how much did you drink on average?

..... ☐ glasses ☐ bottles ☐ litres

46. How often did you drink drinks containing spirits?

..... ☐ day ☐ week ☐ month ☐ year

47. When you drank drinks containing spirits, how many did you drink on average?

..... ☐ glasses

48. Between the ages of 15-19, what was the most alcoholic drinks that you consumed on any one occasion?

.....

49. Between the ages of 20-29 did you drink beer ☐ yes ☐ no, wine ☐ yes ☐ no or drinks containing spirits ☐ yes ☐ no?

*(IF NO, to all three, go to Q56)*

50. How often did you drink beer?

..... ☐ day ☐ week ☐ month ☐ year

51. When you drank beer how much did you drink on average?

..... ☐ glasses ☐ pots ☐ cans ☐ stubbies ☐ bottles

52. How often did you drink wine?

..... ☐ day ☐ week ☐ month ☐ year

53. When you drank wine how much did you drink on average?

..... ☐ glasses ☐ bottles ☐ litres

54. How often did you drink drinks containing spirits?  
..... ☐ day ☐ week ☐ month ☐ year
55. When you drank drinks containing spirits, how many did you drink on average?  
..... ☐ glasses
56. Between the ages of 30-39 did you drink beer ☐ yes ☐ no,  
wine ☐ yes ☐ no or drinks containing spirits ☐ yes ☐ no?  
*(IF NO, to all three, go to Q63)*
57. How often did you drink beer?  
..... ☐ day ☐ week ☐ month ☐ year
58. When you drank beer how much did you drink on average?  
..... ☐ glasses ☐ pots ☐ cans ☐ stubbies ☐ bottles
59. How often did you drink wine?  
..... ☐ day ☐ week ☐ month ☐ year
60. When you drank wine how much did you drink on average?  
..... ☐ glasses ☐ bottles ☐ litres
61. How often did you drink drinks containing spirits?  
..... ☐ day ☐ week ☐ month ☐ year
62. When you drank drinks containing spirits, how many did you drink on average?  
..... ☐ glasses
63. Between the ages of 40-49 did you drink beer ☐ yes ☐ no,  
wine ☐ yes ☐ no or drinks containing spirits ☐ yes ☐ no?  
*(IF NO, to all three, go to Q70)*
64. How often did you drink beer?  
..... ☐ day ☐ week ☐ month ☐ year
65. When you drank beer how much did you drink on average?  
..... ☐ glasses ☐ pots ☐ cans ☐ stubbies ☐ bottles
66. How often did you drink wine?  
..... ☐ day ☐ week ☐ month ☐ year
67. When you drank wine how much did you drink on average?  
..... ☐ glasses ☐ bottles ☐ litres

68. How often did you drink drinks containing spirits?  
..... ☐ day ☐ week ☐ month ☐ year
69. When you drank drinks containing spirits, how many did you drink on average?  
..... ☐ glasses
70. Between the ages of 50-59 did you drink beer ☐ yes ☐ no,  
wine ☐ yes ☐ no or drinks containing spirits ☐ yes ☐ no?  
*(IF NO, to all three, go to Q77)*
71. How often did you drink beer?  
..... ☐ day ☐ week ☐ month ☐ year
72. When you drank beer how much did you drink on average?  
..... ☐ glasses ☐ pots ☐ cans ☐ stubbies ☐ bottles
73. How often did you drink wine?  
..... ☐ day ☐ week ☐ month ☐ year
74. When you drank wine how much did you drink on average?  
..... ☐ glasses ☐ bottles ☐ litres
75. How often did you drink drinks containing spirits?  
..... ☐ day ☐ week ☐ month ☐ year
76. When you drank drinks containing spirits, how many did you drink on average?  
..... ☐ glasses
77. Between the ages of 60-69 did you drink beer ☐ yes ☐ no,  
wine ☐ yes ☐ no or drinks containing spirits ☐ yes ☐ no?  
*(IF NO, to all three, go to Q84)*
78. How often did you drink beer?  
..... ☐ day ☐ week ☐ month ☐ year
79. When you drank beer how much did you drink on average?  
..... ☐ glasses ☐ pots ☐ cans ☐ stubbies ☐ bottles
80. How often did you drink wine?  
..... ☐ day ☐ week ☐ month ☐ year
81. When you drank wine how much did you drink on average?  
..... ☐ glasses ☐ bottles ☐ litres

82. How often did you drink drinks containing spirits?  
 . . . . . ☐ day ☐ week ☐ month ☐ year
83. When you drank drinks containing spirits, how many did you drink on average?  
 . . . . . ☐ glasses
84. What alcoholic beverages, if any, did you drink on each day during the last week?
- MONDAY . . . . .  
 TUESDAY . . . . .  
 WEDNESDAY . . . . .  
 THURSDAY . . . . .  
 FRIDAY . . . . .  
 SATURDAY . . . . .  
 SUNDAY . . . . .
85. Is the amount you drank last week more, less or about the same as you would drink most weeks?

**NOW WE WOULD LIKE TO ASK YOU SOME QUESTIONS RELATING TO PHYSICAL ACTIVITY**

87. ~~86.~~ On average, (e.g., over the last 6 months) how many times a week do you exercise vigorously for a period of at least 20 minutes? ("**Vigorously**" means making you sweat or feel out of breath, and includes such activities as swimming, tennis, netball, athletics and running.)
- ☐ none at all      ☐ 6 or 7 times a week  
☐ once or twice a week  
☐ three or more times a week
88. ~~87.~~ If you exercise vigorously "3 or more times a week", for how long have you been doing this level of activity?
- ☐ less than 3 months  
☐ more than 3 months but less than 1 year  
☐ more than 1 year but less than 5 years  
☐ 5 years or more
89. ~~88.~~ On average, (e.g. over the last 6 months) how many times a week do you engage in less vigorous exercise for recreation, sport or health and fitness purposes, which did not make you sweat or feel out of breath (and includes such activities as bike riding, dancing, etc.)
- ☐ not at all  
☐ once or twice a week  
☐ three or more times a week
86. ~~89.~~ On average, (e.g., over the last 6 months) how many times a week do you walk for recreation or exercise?
- ☐ not at all  
☐ once or twice a week  
☐ three or more times a week

90. On average, in the course of your tasks at work and around the house, how much time are you involved in moderate to heavy physical exertion (*exertion which made you breathe harder or puff and pant*).

**At Work**

None at all ☐

Total time ..... hours ..... mins per ☐ day or ☐ week

**At Home**

None at all ☐

Total time ..... hours ..... mins per ☐ day or ☐ week

**FOR WOMEN ONLY**

91. How old were you when you had your first menstrual period? .....

92. Have you ever been pregnant? ☐ yes ☐ no

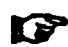 If NO, go to Q 94

93. Please give details about all of your pregnancies irrespective of outcome (*include all miscarriages and terminations*)

| Year pregnancy | for how many weeks were you pregnant? | live birth Yes/No | Breastfeeding ended (in months) |
|----------------|---------------------------------------|-------------------|---------------------------------|
|                |                                       |                   |                                 |
|                |                                       |                   |                                 |
|                |                                       |                   |                                 |
|                |                                       |                   |                                 |
|                |                                       |                   |                                 |

94. Have you ever used the contraceptive pill?  
☐ no ☐ yes, in the past ☐ yes, currently

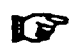 If NO, go to Q 97

95. How old were you when you first started taking the contraceptive pill?  
.....

96. For how long have you used the pill altogether? .....

97. Have you had a menstrual period in the last 12 months?  
☐ yes ☐ no

**\*\* IF YES, STOP you have completed the questionnaire \*\***

98. If NO, how old were you when you had your last period? .....

99. Why have your periods stopped?

- ☐ naturally, as part of the change of life
- ☐ following a hysterectomy
- ☐ for another reason (specify) . . . . .

100. Have you had a hysterectomy?

- ☐ yes
- ☐ no

☛ *If NO, go to Q 103*

101. How old were you when you had your hysterectomy?

102. Were your ovaries removed?

- ☐ yes      ☐ no

103. Has a doctor prescribed female hormone medications such as oestrogen replacement pills or injections to reduce the symptoms of the menopause?

- ☐ no
- ☐ yes, in the past
- ☐ yes, currently

**\*\* IF NO, STOP you have completed the questionnaire \*\***

104. How old were you when your first started taking female hormone or oestrogen replacement pills or injections?

105. How old were you when you last stopped taking female hormone or oestrogen replacement pills or injections?

106. When you were last taking female hormone or oestrogen replacement pills or injections do/did you regularly take any other pill for part of each month with them as part of your treatment?

- ☐ yes      ☐ no

☛ *If NO, go to Q 108*

107. What was the name of the other pill that you take/took while taking female hormone or oestrogen replacement pills or injections?

108. For about how long altogether (have/did) you take(n) female hormone or replacement oestrogen pills or injections?
