# Supplementary material for: Prospective Evaluation over 15 Years of Six Breast Cancer Risk Models
Source: Cancers (Basel). 2021 Oct 16;13(20):5194. doi: 10.3390/cancers13205194 (PMC8534072; doi:10.3390/cancers13205194)
Supplement: Supplementary file 1 [file cancers-13-05194-s001.zip › MCCS_Questionnaire_FUP1.pdf]

## A study of lifestyle and health

## ID Number

**Date of birth:**

Please check the details above and correct any errors if necessary. If you are planning to move, write the new address (or a suitable postal address) in the space on the right.

**Please read this page carefully before you start.**

- ▶ Use a soft pencil only (preferably a 2B pencil).
- ▶ Fill in the bubbles completely, as in the example 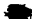 **do not use** 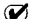 **or** 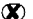.
- ▶ Only write in the space provided. If you need to give more information, use the yellow “extra comments” sheet.
- ▶ **Avoid leaving questions blank.** Try to answer every question, even if the answer is **no**, **never**, or **don’t know**.
- ▶ Should you need any help in completing this questionnaire call:  
9279 1323 (English), 9279 1322 (Greek) or 9279 1324 (Italian).
- ▶ **Do not fold this booklet.**
- ▶ When completed, check that you have answered all questions.
- ▶ We would be grateful if you could return this booklet and the yellow “extra comments” sheet in the envelope provided within a couple of weeks.
- ▶ **Do not staple the extra comments sheet to the booklet.**

**OFFICE USE ONLY**

| ID NUMBER |   |   |   |   |
|-----------|---|---|---|---|
|           |   |   |   |   |
| 0         | 0 | 0 | 0 | 0 |
| 1         | 1 | 1 | 1 | 1 |
| 2         | 2 | 2 | 2 | 2 |
| 3         | 3 | 3 | 3 | 3 |
| 4         | 4 | 4 | 4 | 4 |
| 5         | 5 | 5 | 5 | 5 |
| 6         | 6 | 6 | 6 | 6 |
| 7         | 7 | 7 | 7 | 7 |
| 8         | 8 | 8 | 8 | 8 |
| 9         | 9 | 9 | 9 | 9 |

**Thank you for your continuing  
contribution to Health 2000.  
We will contact you again  
in 3 to 4 years time.**

**SECTION 1:****HOSPITAL ADMISSIONS****1**

In the last 5 years, have you been admitted to hospital?

☐ No ☐ YesIf **YES**, fill in the details below (women include any maternity admissions)

Reason for hospital admission

Month / Year

Hospital

|       |       |       |
|-------|-------|-------|
| _____ | _____ | _____ |
| _____ | _____ | _____ |

**SECTION 2:****FAMILY EVENTS****1**

What is your present marital status?

☐ never married      ☐ married / de facto      ☐ other committed relationship  
☐ separated      ☐ divorced      ☐ widowed

**2**

Is your parent, brother, sister, child or spouse also in HEALTH 2000?

☐ No ☐ YesIf **YES**, fill out their name, their relationship to you, and (if known) their HEALTH 2000 Number.

Name

Relation to you

Health 2000 Number

|       |       |       |
|-------|-------|-------|
| _____ | _____ | _____ |
| _____ | _____ | _____ |

**3**

In the last 5 years, has a parent, brother, sister, child or spouse either been newly diagnosed with a serious illness (such as cancer) or died?

☐ No ☐ YesIf **YES**, please give the following details. **Note:** if a relative has died, give **Age** and **Date** of death as accurately as possible. If a relative is living give the **Age** and **Date** of diagnosis.**DETAILS OF DIAGNOSIS OR DEATH**

| Name (Optional) | Relation to you | Living                | Deceased              | Illness / Cause of Death | Age<br>(see note above) | Date  |
|-----------------|-----------------|-----------------------|-----------------------|--------------------------|-------------------------|-------|
| _____           | _____           | <input type="radio"/> | <input type="radio"/> | _____                    | _____                   | _____ |
| _____           | _____           | <input type="radio"/> | <input type="radio"/> | _____                    | _____                   | _____ |
| _____           | _____           | <input type="radio"/> | <input type="radio"/> | _____                    | _____                   | _____ |
| _____           | _____           | <input type="radio"/> | <input type="radio"/> | _____                    | _____                   | _____ |
| _____           | _____           | <input type="radio"/> | <input type="radio"/> | _____                    | _____                   | _____ |

**SECTION 3:****YOUR FAMILY DOCTOR OR LOCAL HEALTH CENTRE**

As some people change their doctor from time to time, we would like to update our records in regard to the doctor or clinic you attend most often for your health care.

Please fill out the name and address of your current doctor or health centre.

NAME: \_\_\_\_\_

ADDRESS: \_\_\_\_\_

POSTCODE: \_\_\_\_\_

PHONE: \_\_\_\_\_

**\*\* If not enough space, use yellow extra comments sheet \*\***

## HEALTH CONDITIONS

Give an answer for each item. If **“Yes”**, give the year the diagnosis was made or the operation was performed.

☒ Yes      Year 

|   |   |
|---|---|
| 9 | 5 |
|---|---|

|   |   |   |   |   |                                  |   |                                  |   |   |
|---|---|---|---|---|----------------------------------|---|----------------------------------|---|---|
| 2 | 3 | 4 | 5 | 6 | 7                                | 8 | <input checked="" type="radio"/> |   |   |
| 0 | 1 | 2 | 3 | 4 | <input checked="" type="radio"/> | 6 | 7                                | 8 | 9 |

## Angina

☐ Yes    Year 

|  |  |
|--|--|
|  |  |
|--|--|

☐ No    19 

|  |  |
|--|--|
|  |  |
|--|--|

|     |     |     |     |     |     |     |     |     |     |
|-----|-----|-----|-----|-----|-----|-----|-----|-----|-----|
| (2) | (3) | (4) | (5) | (6) | (7) | (8) | (9) |     |     |
| (0) | (1) | (2) | (3) | (4) | (5) | (6) | (7) | (8) | (9) |

☐ Yes    Year 

|  |  |
|--|--|
|  |  |
|--|--|

☐ No    19 

|  |  |
|--|--|
|  |  |
|--|--|

|     |     |     |     |     |     |     |     |     |     |
|-----|-----|-----|-----|-----|-----|-----|-----|-----|-----|
| (2) | (3) | (4) | (5) | (6) | (7) | (8) | (9) |     |     |
| (0) | (1) | (2) | (3) | (4) | (5) | (6) | (7) | (8) | (9) |

☐ Yes    Year 

|  |  |
|--|--|
|  |  |
|--|--|

☐ No    19 

|  |  |
|--|--|
|  |  |
|--|--|

|     |     |     |     |     |     |     |     |     |     |
|-----|-----|-----|-----|-----|-----|-----|-----|-----|-----|
|     | (2) | (3) | (4) | (5) | (6) | (7) | (8) | (9) |     |
| (0) | (1) | (2) | (3) | (4) | (5) | (6) | (7) | (8) | (9) |

☐ Yes    Year 

|  |  |
|--|--|
|  |  |
|--|--|

☐ No    19 

|  |  |
|--|--|
|  |  |
|--|--|

|     |     |     |     |     |     |     |     |     |     |
|-----|-----|-----|-----|-----|-----|-----|-----|-----|-----|
| (2) | (3) | (4) | (5) | (6) | (7) | (8) | (9) |     |     |
| (0) | (1) | (2) | (3) | (4) | (5) | (6) | (7) | (8) | (9) |

☐ Yes    Year 

|  |  |
|--|--|
|  |  |
|--|--|

☐ No    19 

|  |  |
|--|--|
|  |  |
|--|--|

|     |     |     |     |     |     |     |     |     |     |
|-----|-----|-----|-----|-----|-----|-----|-----|-----|-----|
| (2) | (3) | (4) | (5) | (6) | (7) | (8) | (9) |     |     |
| (0) | (1) | (2) | (3) | (4) | (5) | (6) | (7) | (8) | (9) |

☐ Yes    Year 

|  |  |
|--|--|
|  |  |
|--|--|

☐ No    19 

|  |  |
|--|--|
|  |  |
|--|--|

|     |     |     |     |     |     |     |     |     |     |
|-----|-----|-----|-----|-----|-----|-----|-----|-----|-----|
| (2) | (3) | (4) | (5) | (6) | (7) | (8) | (9) |     |     |
| (0) | (1) | (2) | (3) | (4) | (5) | (6) | (7) | (8) | (9) |

☐ Yes    Year 

|  |  |
|--|--|
|  |  |
|--|--|

☐ No    19 

|   |   |   |   |   |   |   |   |   |   |
|---|---|---|---|---|---|---|---|---|---|
|   |   |   |   |   |   |   |   |   |   |
| 0 | 1 | 2 | 3 | 4 | 5 | 6 | 7 | 8 | 9 |

☐ Yes    Year 

|  |  |
|--|--|
|  |  |
|--|--|

☐ No    19 

|  |  |
|--|--|
|  |  |
|--|--|

|     |     |     |     |     |     |     |     |     |     |
|-----|-----|-----|-----|-----|-----|-----|-----|-----|-----|
|     | (2) | (3) | (4) | (5) | (6) | (7) | (8) | (9) |     |
| (0) | (1) | (2) | (3) | (4) | (5) | (6) | (7) | (8) | (9) |

☐ Yes    Year 

|  |  |
|--|--|
|  |  |
|--|--|

☐ No    19 

|   |   |   |   |   |   |   |   |   |   |
|---|---|---|---|---|---|---|---|---|---|
|   |   |   |   |   |   |   |   |   |   |
| 0 | 1 | 2 | 3 | 4 | 5 | 6 | 7 | 8 | 9 |

☐ Yes    Year 

|  |  |
|--|--|
|  |  |
|--|--|

☐ No    19 

|  |  |
|--|--|
|  |  |
|--|--|

|     |     |     |     |     |     |     |     |     |     |
|-----|-----|-----|-----|-----|-----|-----|-----|-----|-----|
|     | (2) | (3) | (4) | (5) | (6) | (7) | (8) | (9) |     |
| (0) | (1) | (2) | (3) | (4) | (5) | (6) | (7) | (8) | (9) |

☐ Yes    Year 

|  |  |
|--|--|
|  |  |
|--|--|

☐ No    19 

|   |   |   |   |   |   |   |   |   |   |
|---|---|---|---|---|---|---|---|---|---|
|   |   |   |   |   |   |   |   |   |   |
| 0 | 1 | 2 | 3 | 4 | 5 | 6 | 7 | 8 | 9 |

## Liver disease

☐ Yes    Year 

|  |  |
|--|--|
|  |  |
|--|--|

  
☐ No    19 

|  |  |
|--|--|
|  |  |
|--|--|

Type of liver disease \_\_\_\_\_

## Gallstones

☐ Yes    Year 

|  |  |
|--|--|
|  |  |
|--|--|

☐ No    19 

|   |   |   |   |   |   |   |   |   |   |
|---|---|---|---|---|---|---|---|---|---|
|   |   |   |   |   |   |   |   |   |   |
| 0 | 1 | 2 | 3 | 4 | 5 | 6 | 7 | 8 | 9 |

## Kidney stones

☐ Yes    Year 

|  |  |
|--|--|
|  |  |
|--|--|

☐ No    19 

|   |   |   |   |   |   |   |   |   |   |
|---|---|---|---|---|---|---|---|---|---|
|   |   |   |   |   |   |   |   |   |   |
| 0 | 1 | 2 | 3 | 4 | 5 | 6 | 7 | 8 | 9 |

## Cataracts

☐ Yes    Year 

|  |  |
|--|--|
|  |  |
|--|--|

☐ No    19 

|  |  |
|--|--|
|  |  |
|--|--|

|     |     |     |     |     |     |     |     |     |     |
|-----|-----|-----|-----|-----|-----|-----|-----|-----|-----|
| (2) | (3) | (4) | (5) | (6) | (7) | (8) | (9) |     |     |
| (0) | (1) | (2) | (3) | (4) | (5) | (6) | (7) | (8) | (9) |

**Fracture (broken bone(s))**

☐ Yes    Year 

|  |  |
|--|--|
|  |  |
|--|--|

☐ No    19 

|  |  |
|--|--|
|  |  |
|--|--|

|     |     |     |     |     |     |     |     |     |     |
|-----|-----|-----|-----|-----|-----|-----|-----|-----|-----|
| (2) | (3) | (4) | (5) | (6) | (7) | (8) | (9) |     |     |
| (0) | (1) | (2) | (3) | (4) | (5) | (6) | (7) | (8) | (9) |

Type of fracture \_\_\_\_\_

**Other severe or long term medical condition(s)**

☐ Yes    Year 

|  |  |
|--|--|
|  |  |
|--|--|

☐ No    19 

|   |   |   |   |   |   |   |   |   |   |
|---|---|---|---|---|---|---|---|---|---|
|   |   |   |   |   |   |   |   |   |   |
| 0 | 1 | 2 | 3 | 4 | 5 | 6 | 7 | 8 | 9 |

Type of medical condition \_\_\_\_\_

☐ Yes    Year 

|  |  |
|--|--|
|  |  |
|--|--|

☐ No    19 

|  |  |
|--|--|
|  |  |
|--|--|

|     |     |     |     |     |     |     |     |     |     |
|-----|-----|-----|-----|-----|-----|-----|-----|-----|-----|
| (2) | (3) | (4) | (5) | (6) | (7) | (8) | (9) |     |     |
| (0) | (1) | (2) | (3) | (4) | (5) | (6) | (7) | (8) | (9) |

Type of medical condition \_\_\_\_\_

## MEDICAL EXAMINATIONS

**Have you had any of the following examinations or tests *in the last 5 years*.**

Answer Yes or No for each item. If **Yes**, give the year in which you last had it performed.

**Skin examination** (doctor checks for skin cancer)

☐ Yes      Year

☐ No      199

### Skin examination by yourself or a friend

☐ Yes      Year

☐ No      199

**Test for blood in faeces** (bowel motions)

☐ Yes      Year

☐ No      199

**Rectal examination** (doctor uses a finger to check the back passage)

☐ Yes      Year

☐ No      199

**Have you had any of the following examinations or tests in the last 5 years?**

**Sigmoidoscopy** (doctor uses a tube to examine lower bowel)

☐ Yes      Year            
☐ No      199

**Colonoscopy** (doctor uses a long tube to examine the whole bowel)

☐ Yes      Year            
☐ No      199

**Barium Meal** (X-ray of stomach after drinking barium)

☐ Yes      Year            
☐ No      199

**Barium Enema** (X-ray of bowel after having a barium enema)

☐ Yes      Year            
☐ No      199

**Chest X-ray**

☐ Yes      Year            
☐ No      199

**CAT Scan / MRI Scan**

☐ Yes      Year            
☐ No      199

#### MEN ONLY

**Blood test for PSA** (prostate specific antigen)

☐ Yes      Year            
☐ No      199

#### WOMEN ONLY

**Vaginal examination by a doctor**

☐ Yes      Year            
☐ No      199

**Pap test (Pap smear)**

☐ Yes      Year            
☐ No      199

**Mammogram**

☐ Yes      Year            
☐ No      199

**Breast examination by a doctor**

☐ Yes      Year            
☐ No      199

**Breast self examination**

☐ Yes      Year            
☐ No      199

## SECTION 6:

### PAIN KILLERS

**On average, how many tablets or capsules do you take of the following types of pain killer?**

To help you, please look at the list on the back of this booklet to see what names are included in each of the categories.

|                                                |                       |                              |                       |                       |                       |                       |
|------------------------------------------------|-----------------------|------------------------------|-----------------------|-----------------------|-----------------------|-----------------------|
|                                                | than 1 per week       | none or less than 1 per week | 1 or 2 per week       | 3 to 5 per week       | about 1 per day       | more than 1 per day   |
| PARACETAMOL                                    | <input type="radio"/> | <input type="radio"/>        | <input type="radio"/> | <input type="radio"/> | <input type="radio"/> | <input type="radio"/> |
| ASPIRIN 300 mg                                 | <input type="radio"/> | <input type="radio"/>        | <input type="radio"/> | <input type="radio"/> | <input type="radio"/> | <input type="radio"/> |
| ASPIRIN 100 mg                                 | <input type="radio"/> | <input type="radio"/>        | <input type="radio"/> | <input type="radio"/> | <input type="radio"/> | <input type="radio"/> |
| NSAIDs (non-steroidal anti-inflammatory drugs) | <input type="radio"/> | <input type="radio"/>        | <input type="radio"/> | <input type="radio"/> | <input type="radio"/> | <input type="radio"/> |

**If you currently use any of the above regularly (at least once per week), for about how many years have you used them?**

|             |                       |                       |                       |                       |                       |
|-------------|-----------------------|-----------------------|-----------------------|-----------------------|-----------------------|
|             | I don't use regularly | less than 1 year      | 1 to 2 years          | 3 to 5 years          | more than 5 years     |
| PARACETAMOL | <input type="radio"/> |
| ASPIRIN     | <input type="radio"/> |
| NSAIDs      | <input type="radio"/> |

## SECTION 7:

### SMOKING

1

**Over the last 5 years have you smoked cigarettes at all?**

☐ No    ► Go to SECTION 8    ☐ Yes

2

**Do you currently smoke cigarettes?**

☐ No    ☐ Yes    ► Go to Question 5

3

**How many years ago did you quit?**

☐ Less than 1 year  
☐ 1    ☐ 2    ☐ 3    ☐ 4    ☐ 5 years

4

**How many cigarettes did you smoke each day in the year before you quit?**

☐ 1 - 4    ☐ 15 - 24    ☐ 40 or more  
☐ 5 - 14    ☐ 25 - 39

► Go to SECTION 8

5

**On average how many cigarettes do you smoke each day?**

☐ 1 - 4    ☐ 15 - 24    ☐ 40 or more  
☐ 5 - 14    ☐ 25 - 39

## SECTION 8:

### GENERAL ITEMS

#### 1 How much do you weigh now?

☐ Don't know

|   |   |   |
|---|---|---|
|   |   |   |
| 0 | 0 |   |
| 1 | 1 | 1 |
| 2 | 2 | 2 |
| 3 | 3 |   |
| 4 | 4 |   |
| 5 | 5 |   |
| 6 | 6 |   |
| 7 | 7 |   |
| 8 | 8 |   |
| 9 | 9 |   |

Kilos

OR

|   |   |   |    |
|---|---|---|----|
|   |   |   |    |
| 0 |   | 0 | 10 |
| 1 | 1 | 1 | 11 |
| 2 | 2 | 2 | 12 |
| 3 | 3 | 3 | 13 |
| 4 | 4 | 4 |    |
| 5 | 5 | 5 |    |
| 6 | 6 | 6 |    |
| 7 | 7 | 7 |    |
| 8 | 8 | 8 |    |
| 9 | 9 | 9 |    |

Stones

Pounds

#### 2 What is your waist size? While standing, please measure to the nearest centimetre using a tape measure placed at the level of your navel - do not pull in your stomach.

☐ Don't know

|   |   |   |
|---|---|---|
|   |   |   |
| 0 | 0 |   |
| 1 | 1 | 1 |
| 2 | 2 | 2 |
| 3 | 3 |   |
| 4 | 4 |   |
| 5 | 5 |   |
| 6 | 6 |   |
| 7 | 7 |   |
| 8 | 8 |   |
| 9 | 9 |   |

cms

OR

|   |   |
|---|---|
|   |   |
| 0 | 0 |
| 1 | 1 |
| 2 | 2 |
| 3 | 3 |
| 4 | 4 |
| 5 | 5 |
| 6 | 6 |
| 7 | 7 |
| 8 | 8 |
| 9 | 9 |

inches

#### 3 With which hand do you usually?

write ☐ left ☐ either ☐ right  
throw a ball ☐ left ☐ either ☐ right

#### 4 Employment status

- ☐ employed, less than 20 hours per week  
☐ employed, 20 or more hours per week  
☐ home duties  
☐ unemployed  
☐ retired  
☐ student

## SECTION 9:

### FOOD AND DRINK

#### 1 What one type of bread do you eat most often?

- ☐ fibre increased white bread (eg. Hifibre)  
☐ white bread  
☐ wholemeal bread  
☐ multi-grain bread  
☐ other, please specify \_\_\_\_\_  
☐ I don't eat bread ► Go to question 5

2

#### On a typical day, how many slices of bread do you usually eat? (count one bread roll as 2 slices)

- ☐ 1 slice per day  
☐ 2 slices per day  
☐ 3 slices per day  
☐ 4 slices per day  
☐ 5 - 7 slices per day  
☐ 8 or more slices per day

3

#### Which one of the following do you most often put on bread?

- ☐ polyunsaturated margarine (made from sunflower, safflower or corn oil)  
☐ monounsaturated margarine (made from canola or olive oil)  
☐ butter and margarine blends  
☐ butter  
☐ olive oil ► Go to question 5  
☐ I don't usually put any oil or fat spread on bread ► Go to question 5

4

#### How do you usually spread butter or margarine on a slice of bread?

- ☐ thickly  
☐ medium (the amount in a single wrapped portion in restaurants)  
☐ thinly

5

#### How many eggs do you usually eat each week?

- ☐ less than 1 egg per week  
☐ 1 - 2 eggs per week  
☐ 3 - 5 eggs per week  
☐ 6 or more eggs per week  
☐ I don't eat eggs

6

#### How many serves of fruit do you usually eat each day? (a "serve" = 1 medium piece or 2 small pieces of fruit or 1 cup of diced pieces)

- ☐ 1 serve or less  
☐ 2 - 3 serves  
☐ 4 - 5 serves  
☐ 6 serves or more  
☐ I don't eat fruit

7

#### How many serves of vegetables do you usually eat each day? (a "serve" = 1/2 cup cooked vegetables or 1 cup of salad vegetables)

- ☐ 1 serve or less  
☐ 2 - 3 serves  
☐ 4 - 5 serves  
☐ 6 serves or more  
☐ I don't eat vegetables

8

How much salt is added during cooking to the vegetables you eat at home?

- ☐ none  
☐ just a little  
☐ a moderate amount  
☐ quite a lot

9

When available, how often do you choose foods labelled low salt, salt reduced or no added salt?

- ☐ never  
☐ occasionally  
☐ about half the time  
☐ mostly  
☐ always

10

When you eat grilled or roast meat, how is it usually cooked?

- ☐ rare  
☐ medium rare  
☐ medium  
☐ well done  
☐ very well done  
☐ I don't eat meat ► Go to question 12

11

On average during the last year, how often did you eat meat that had been cooked in the following ways?

|                      | never                 | 1 to 3 times per month | once per week         | twice per week        | 3 or more times per week |
|----------------------|-----------------------|------------------------|-----------------------|-----------------------|--------------------------|
| Casseroled or stewed | <input type="radio"/> | <input type="radio"/>  | <input type="radio"/> | <input type="radio"/> | <input type="radio"/>    |
| Grilled              | <input type="radio"/> | <input type="radio"/>  | <input type="radio"/> | <input type="radio"/> | <input type="radio"/>    |
| Roasted              | <input type="radio"/> | <input type="radio"/>  | <input type="radio"/> | <input type="radio"/> | <input type="radio"/>    |
| Fried or stir fried  | <input type="radio"/> | <input type="radio"/>  | <input type="radio"/> | <input type="radio"/> | <input type="radio"/>    |
| Barbequed            | <input type="radio"/> | <input type="radio"/>  | <input type="radio"/> | <input type="radio"/> | <input type="radio"/>    |

12

What one type of milk do you drink or use most often?

- ☐ Full cream milk  
☐ Reduced fat milk (eg REV, PhysiCAL)  
☐ Skim milk  
☐ Soya milk  
☐ Other \_\_\_\_\_  
☐ I don't drink milk ► Go to question 14

13

How much milk do you usually drink each day (including milk with tea, coffee, cereal etc)?

- ☐ Less than 250 ml (1 large cup or mug)  
☐ 250 - 500 ml (1-2 cups)  
☐ 500 - 750 ml (2-3 cups)  
☐ 750 ml (3 cups) or more

14

For each food, indicate HOW MUCH ON AVERAGE you usually eat at a meal by marking one of the bubbles (○) below the pictures. If you eat two or more helpings, count them altogether.

When you eat steak, do you usually eat:

☐ I never eat steak

100g

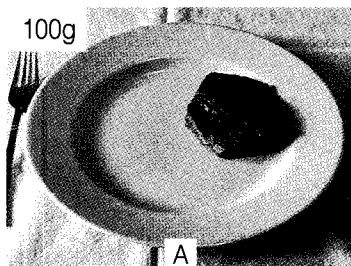

A

125g

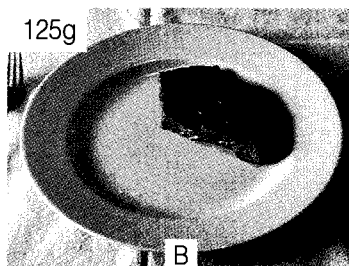

B

175g

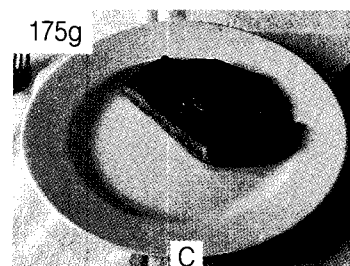

C

- ☐ Less than A    ☐ A    ☐ Between A & B    ☐ B    ☐ Between B & C    ☐ C    ☐ More than C

When you eat casserole, do you usually eat:

☐ I never eat casserole

100g

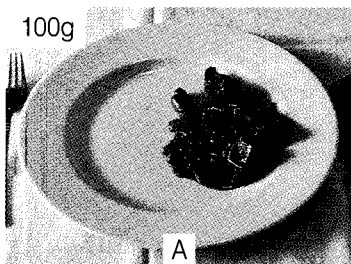

A

180g

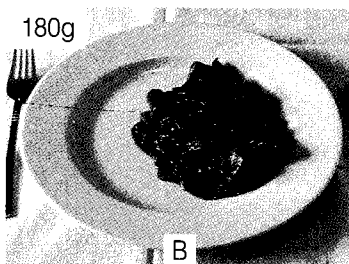

B

270g

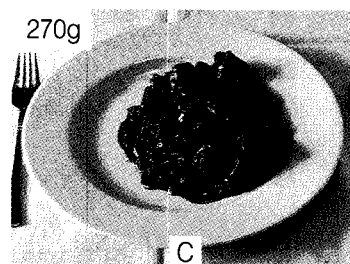

C

- ☐ Less than A    ☐ A    ☐ Between A & B    ☐ B    ☐ Between B & C    ☐ C    ☐ More than C

When you eat rice, do you usually eat:

☐ I never eat rice

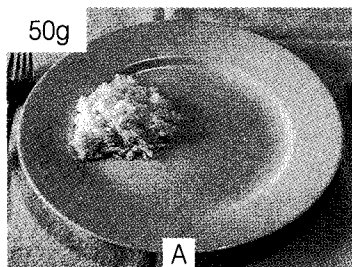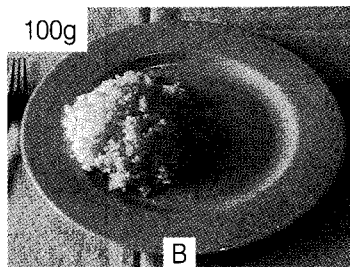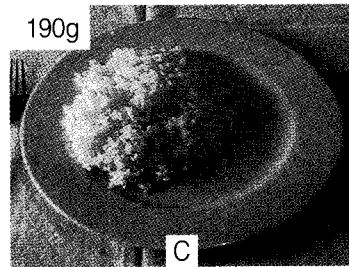

☐ Less than A

☐ A

☐ Between A & B

☐ B

☐ Between B & C

☐ C

☐ More than C

When you eat potato, do you usually eat:

☐ I never eat potato

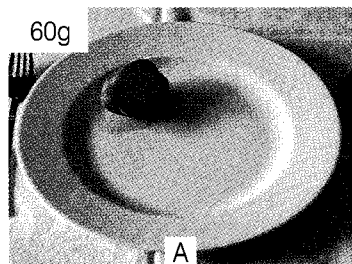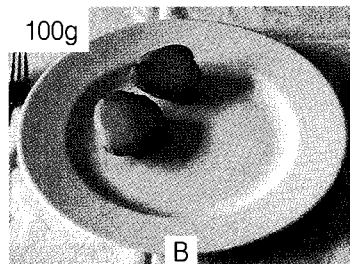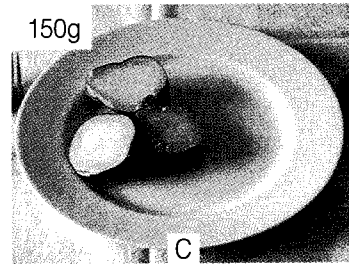

☐ Less than A

☐ A

☐ Between A & B

☐ B

☐ Between B & C

☐ C

☐ More than C

When you eat vegetables, do you usually eat:

☐ I never eat vegetables

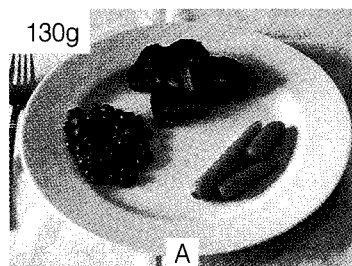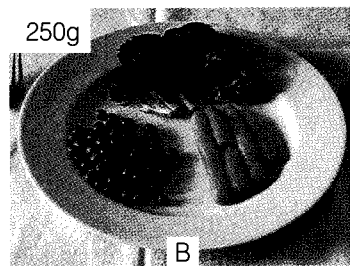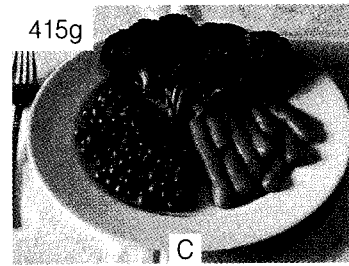

☐ Less than A

☐ A

☐ Between A & B

☐ B

☐ Between B & C

☐ C

☐ More than C

When you eat salad, do you usually eat:

☐ I never eat salad

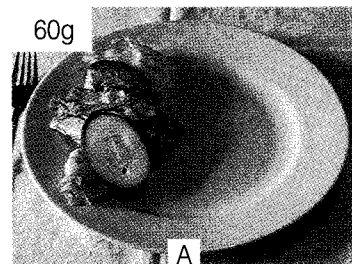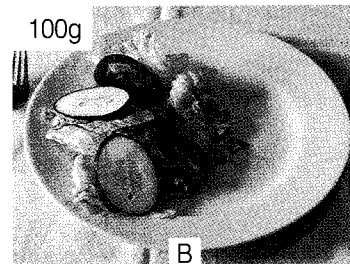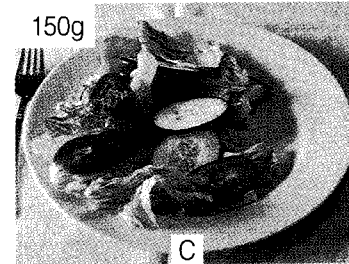

☐ Less than A

☐ A

☐ Between A & B

☐ B

☐ Between B & C

☐ C

☐ More than C

15

**On average, how many cups or glasses of the following did you drink over the last year.**

As the amount of some drinks will vary according to the weather, give the amount that you would drink during moderate conditions, neither too hot nor too cold. (mark only one answer per line)

| Average number of <b>cups or glasses</b> you drank over the last year | never                 | per month             |                       | per week              |                       |                       | per day               |                       |                       |                       |
|-----------------------------------------------------------------------|-----------------------|-----------------------|-----------------------|-----------------------|-----------------------|-----------------------|-----------------------|-----------------------|-----------------------|-----------------------|
|                                                                       |                       | less than 1           | 1 - 3                 | 1                     | 2 - 4                 | 5 - 6                 | 1                     | 2 - 3                 | 4 - 5                 | 6 or more             |
| water                                                                 | <input type="radio"/> |
| tea (including herbal tea)                                            | <input type="radio"/> |
| coffee                                                                | <input type="radio"/> |
| fruit juice or drink                                                  | <input type="radio"/> |
| low alcohol beer                                                      | <input type="radio"/> |
| full strength beer                                                    | <input type="radio"/> |
| red wine                                                              | <input type="radio"/> |
| white wine (inc. sparkling)                                           | <input type="radio"/> |
| spirits, liqueurs, sherry, port                                       | <input type="radio"/> |

16

**Over the last year, how often did you eat the following foods, ingredients or supplements?**  
(mark only one answer per line)

| Average number of <b>times</b> you consumed these foods over the last year | never                 | per month             |                       | per week              |                       |                       |                       | per day               |                       |
|----------------------------------------------------------------------------|-----------------------|-----------------------|-----------------------|-----------------------|-----------------------|-----------------------|-----------------------|-----------------------|-----------------------|
|                                                                            |                       | less than 1           | 1 - 3                 | 1                     | 2                     | 3 - 4                 | 5 - 6                 | 1                     | 2 or more             |
| All Bran                                                                   | <input type="radio"/> |
| Sultana Bran, Fibreplus, Branflakes                                        | <input type="radio"/> |
| Weet Bix, Vita Brits, Weeties                                              | <input type="radio"/> |
| Cornflakes, Nutrigrain, Special K                                          | <input type="radio"/> |
| oatmeal porridge                                                           | <input type="radio"/> |
| muesli                                                                     | <input type="radio"/> |
| citrus fruit, eg. oranges, in summer                                       | <input type="radio"/> |
| citrus fruit, eg. oranges, in winter                                       | <input type="radio"/> |
| fresh tomatoes in summer                                                   | <input type="radio"/> |
| fresh tomatoes in winter                                                   | <input type="radio"/> |
| green salad in summer                                                      | <input type="radio"/> |
| green salad in winter                                                      | <input type="radio"/> |
| salad in a sandwich or roll                                                | <input type="radio"/> |
| dried beans, peas or lentils                                               | <input type="radio"/> |
| fish, tinned or fresh                                                      | <input type="radio"/> |
| chicken                                                                    | <input type="radio"/> |
| veal                                                                       | <input type="radio"/> |
| beef                                                                       | <input type="radio"/> |
| lamb                                                                       | <input type="radio"/> |
| parmesan cheese                                                            | <input type="radio"/> |
| garlic                                                                     | <input type="radio"/> |
| chilli                                                                     | <input type="radio"/> |
| polyunsaturated salad/cooking oil                                          | <input type="radio"/> |
| canola oil                                                                 | <input type="radio"/> |
| olive oil                                                                  | <input type="radio"/> |
| multivitamins - tablets, capsules                                          | <input type="radio"/> |
| vitamin C - tablets, capsules                                              | <input type="radio"/> |
| vitamin E - tablets, capsules                                              | <input type="radio"/> |

17

**If you take vitamins, minerals or other dietary supplements regularly, please write the brands and doses below.**

|       |       |
|-------|-------|
| _____ | _____ |
| _____ | _____ |
| _____ | _____ |

## SECTION 10:

### LIFESTYLE

Questions 1 to 3 relate to **the last 12 months**.

**1** How many times a week did you walk for at least 20 minutes, or at least one kilometre for recreation or exercise?

- ☐ none
- ☐ less than once per week
- ☐ once or twice per week
- ☐ 3 - 5 times per week
- ☐ 6 or more times per week

**2** How many times a week did you engage in more vigorous exercise than walking for at least 20 minutes?

- ☐ none
- ☐ less than once per week
- ☐ once or twice per week
- ☐ 3 - 5 times per week
- ☐ 6 or more times per week

**3** During the last 12 months, to what extent:

|                                                                                                                                   | not at all            | a little bit          | moderately            | quite a bit           | extremely             |
|-----------------------------------------------------------------------------------------------------------------------------------|-----------------------|-----------------------|-----------------------|-----------------------|-----------------------|
| Did health problems limit you in your everyday physical activity (such as walking and climbing stairs)?                           | <input type="radio"/> |
| Did pain interfere with your normal work (including both work outside the house and housework)?                                   | <input type="radio"/> |
| Has your physical health or emotional problems interfered with your normal social activities with family, friends, or groups?     | <input type="radio"/> |
| Have you been bothered by emotional problems (such as feeling anxious, depressed or irritable)?                                   | <input type="radio"/> |
| Was it difficult doing your daily work, both inside and outside the house, because of your physical health or emotional problems? | <input type="radio"/> |

**4**

In general, how would you describe your health?

- ☐ poor
- ☐ fair
- ☐ good
- ☐ very good
- ☐ excellent

**5**

To what extent do you agree or disagree with the following statement: "I'm always optimistic about my future".

- ☐ strongly agree
- ☐ agree
- ☐ neither agree nor disagree
- ☐ disagree
- ☐ strongly disagree

**6**

Including yourself, how many people live in your household?

- ☐ I live alone
- ☐ 2 people
- ☐ 3 or 4 people
- ☐ 5 or more people

**7**

On average, how often do you visit friends and relatives?

- ☐ once per month or less
- ☐ 2 - 3 times per month
- ☐ about once per week
- ☐ 2 - 3 times per week
- ☐ 4 - 6 times per week
- ☐ every day

**8**

On average, how often do friends and relatives visit you at your home?

- ☐ once per month or less
- ☐ 2 - 3 times per month
- ☐ about once per week
- ☐ 2 - 3 times per week
- ☐ 4 - 6 times per week
- ☐ every day

**9**

Do you have someone who makes you feel needed?

- ☐ Yes, very much
- ☐ Yes, somewhat
- ☐ No, not really

## QUESTIONS FOR MEN ONLY

**1** For how many children have you been the biological father?

**Boys**      ☐ none      ☐ 1      ☐ 2      ☐ 3  
☐ 4      ☐ 5 or more

**Girls**      ☐ none      ☐ 1      ☐ 2      ☐ 3  
☐ 4      ☐ 5 or more

**2 Have you had a vasectomy?**

☐ No ☐ Yes

If Yes, in what year?

Year 

|  |  |
|--|--|
|  |  |
|--|--|

 19 

|  |  |
|--|--|
|  |  |
|--|--|

**3** Over the past month, how often have you:

less than 1 time in 5      not at all      more than half the time      about half the time      almost always

Found it difficult to postpone urination? ☒ 1 ☐ 2 ☐ 3 ☐ 4 ☐ 5

Had to push or strain to begin urination? ☐ ☐ ☐ ☐ ☐ ☐

Had a weak urinary stream? ☐ No ☐ Yes

Found you stopped and started again several times when you urinated? ☐ ☐ ☐ ☐ ☐ ☐

Had a sensation of not emptying your bladder completely after you finished urinating?

Had to urinate again  
less than two hours after  
you finished urinating?

**4** Over the past month, how many times did you most typically get up from bed to urinate during the night?

- ☐ never
- ☐ some nights
- ☐ once per night
- ☐ 2 times per night
- ☐ 3 times per night
- ☐ 4 times per night
- ☐ 5 or more times per night

**5** **Has a doctor ever examined your prostate?**

☐ No                      ☐ Don't know  
☐ Yes. I was first examined in \_\_\_\_\_

Year 

|  |  |
|--|--|
|  |  |
|--|--|

|   |   |   |   |   |   |   |   |   |   |
|---|---|---|---|---|---|---|---|---|---|
| 5 | 6 | 7 | 8 | 9 |   |   |   |   |   |
| 0 | 1 | 2 | 3 | 4 | 5 | 6 | 7 | 8 | 9 |

**6** **Has a doctor ever told you that you have an enlarged prostate (or BPH)?**

☐ No      ☐ Yes      ☐ Don't know

If Yes, in what year?

Year 

|  |  |
|--|--|
|  |  |
|--|--|

 19 

|   |   |   |   |   |   |   |   |   |   |
|---|---|---|---|---|---|---|---|---|---|
| 0 | 1 | 2 | 3 | 4 | 5 | 6 | 7 | 8 | 9 |
|---|---|---|---|---|---|---|---|---|---|

**7 Have you ever had a PSA test?**

☐ No ► Go to question 8

☐ Don't know

☐ Yes, I had my first PSA test in

Year 19 

|  |  |
|--|--|
|  |  |
|--|--|

|   |   |   |   |   |   |   |   |   |   |
|---|---|---|---|---|---|---|---|---|---|
|   |   |   |   |   |   |   |   |   |   |
| 0 | 1 | 2 | 3 | 4 | 5 | 6 | 7 | 8 | 9 |

### Why did you have your first PSA test?

☐ because of urinary symptoms

☐ as a health check up

**How many times altogether have you had a PSA test?**

☐ 1    ☐ 2    ☐ 3    ☐ 4    ☐ 5 or more

**Have you ever had treatment for prostate problems?**

☐ No      ☐ Yes

If **Yes**, please complete the details on the yellow sheet provided.

**Has a male relative of yours ever had prostate cancer?**

(include your father, grandfathers, your mother's brothers, your father's brothers, your brothers and sons)

☐ No                      ☐ Yes                      ☐ Don't know

If **Yes**, give their relationship to you and their age at diagnosis (if known).

Relative \_\_\_\_\_ Age \_\_\_\_\_

Relative \_\_\_\_\_ Age

## SECTION 12:

## QUESTIONS FOR WOMEN ONLY

**1 Have you ever given birth to twins, triplets or quads?**

☐ No ☐ Yes

**2 Over the last 5 years have you had any pregnancies (including any miscarriages or terminations)?**

☐ No ☐ Yes

If **Yes**, please give details for each pregnancy on the yellow sheet of paper.

**3 Over the last 5 years for how long, if at all, have you used the contraceptive pill?**

☐ Not at all ► Go to question 4  
☐ less than a year  
☐ 1 ☐ 2 ☐ 3 ☐ 4 ☐ 5 years

**Do you currently take the pill?**

☐ No ☐ Yes

What was the name of the pill you last used (or still use)?

**4 Over the last 5 years for how long, if at all, have you used hormone replacement therapy (HRT)?**

HRT includes female hormone medications such as oestrogen replacement pills, patches, implants or injections.

☐ Not at all ► Go to question 5  
☐ less than a year  
☐ 1 ☐ 2 ☐ 3 ☐ 4 ☐ 5 years

If used at all, what types of HRT have you used? (mark all that apply)

☐ Pills (one type per month)  
☐ Pills (two types per month)  
☐ Patches  
☐ Pills and patches during each month  
☐ Injections  
☐ Implants (under the skin)

Do you currently take **HRT**?

☐ No ☐ Yes

Please write down the name(s) of the **HRT** you last used or still use

**5 Have you had a menstrual period in the last 12 months?**

☐ No ► Go to question 6  
☐ Yes

If **Yes**, are your periods as regular now as they were up to the age of 40?

☐ No ☐ Yes ☐ Don't know

**6 In what year was your last period?**

My last period was in

Year 

|  |  |
|--|--|
|  |  |
|--|--|

|   |   |   |   |   |   |   |   |   |   |
|---|---|---|---|---|---|---|---|---|---|
| 3 | 4 | 5 | 6 | 7 | 8 | 9 |   |   |   |
| 0 | 1 | 2 | 3 | 4 | 5 | 6 | 7 | 8 | 9 |

**7 Have you had a hysterectomy?**

☐ No ☐ Yes

If Yes, in what year?

Year 

|  |  |
|--|--|
|  |  |
|--|--|

|   |   |   |   |   |   |   |   |   |   |
|---|---|---|---|---|---|---|---|---|---|
| 3 | 4 | 5 | 6 | 7 | 8 | 9 |   |   |   |
| 0 | 1 | 2 | 3 | 4 | 5 | 6 | 7 | 8 | 9 |

**8 Have you had any of your ovaries removed?**

☐ No ☐ Yes

If Yes, in what year?

Year 

|  |  |
|--|--|
|  |  |
|--|--|

|   |   |   |   |   |   |   |   |   |   |
|---|---|---|---|---|---|---|---|---|---|
| 3 | 4 | 5 | 6 | 7 | 8 | 9 |   |   |   |
| 0 | 1 | 2 | 3 | 4 | 5 | 6 | 7 | 8 | 9 |

How many ovaries were removed?

☐ one ☐ both ☐ Don't know

**9 Has a female relative of yours ever had breast cancer?**

(include your mother, grandmothers, your mother's sisters, your father's sisters, your sisters and daughters)

☐ No ☐ Yes ☐ Don't know

If **Yes**, give their relationship to you and their age at diagnosis (if known).

Relative \_\_\_\_\_ Age \_\_\_\_\_

Relative \_\_\_\_\_ Age \_\_\_\_\_

## PARACETAMOL PREPARATIONS

Dymadon  
Panadol  
Panamax  
Paraspen  
Setamol  
Temptra  
Tylenol

### Paracetamol mixtures (count as Paracetamol)

Codral  
Dymadon Co  
Fiorinal  
Mersyndol  
Panadeine  
Panalgescic  
Panamax  
Panquil  
Panadol Elixir

## ASPIRIN PREPARATIONS

### Aspirin 300 mg

Aspirin  
Aspro  
Bex  
Bufferin  
Disprin  
Ecotrin  
Solprin  
Spren  
Vincent's Powder  
Winsprin

### Aspirin Mixtures (count as Aspirin 300 mg)

Codiphen  
Codis  
Codox  
Decrin  
Disprin Forte  
Solcode  
Veganin

### Aspirin 100 mg

Cardiprin 100  
Astrix 100  
Cartia

## NON-STEROIDAL ANTI-INFLAMMATORY DRUGS (NSAIDs)

Aclin  
Act -3  
Anaprox  
Arthrexin  
Brufen  
Butazolidin  
Clinoril  
Dolobid  
Feldene  
Fenac  
Indocid  
Inza  
Mefic  
Naprogesic  
Naprosyn  
Nurofen  
Orudis  
Oruvail SR  
Ponstan  
Proxen SR  
Rafen  
Surgam  
Synflex  
Tilcotil  
Voltaren  
Voltaren Rapid

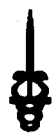 **Anti-Cancer Council**  
of Victoria

© ACCV 1995  
1 Rathdowne Street, Carlton Victoria 3053
