# Supplementary material for: Prospective Evaluation over 15 Years of Six Breast Cancer Risk Models
Source: Cancers (Basel). 2021 Oct 16;13(20):5194. doi: 10.3390/cancers13205194 (PMC8534072; doi:10.3390/cancers13205194)
Supplement: Supplementary file 1 [file cancers-13-05194-s001.zip › Supplementary_Material_20210929_final.pdf]

## Supplementary Materials: Prospective evaluation over 15 years of six breast cancer risk models

Sherly X. Li, Roger L. Milne, Tú Nguyen-Dumont, Dallas R. English, Graham G. Giles, Melissa C. Southey, Antonis C. Antoniou, Andrew Lee, Ingrid Winship, John L. Hopper, Mary Beth Terry and Robert J. MacInnis

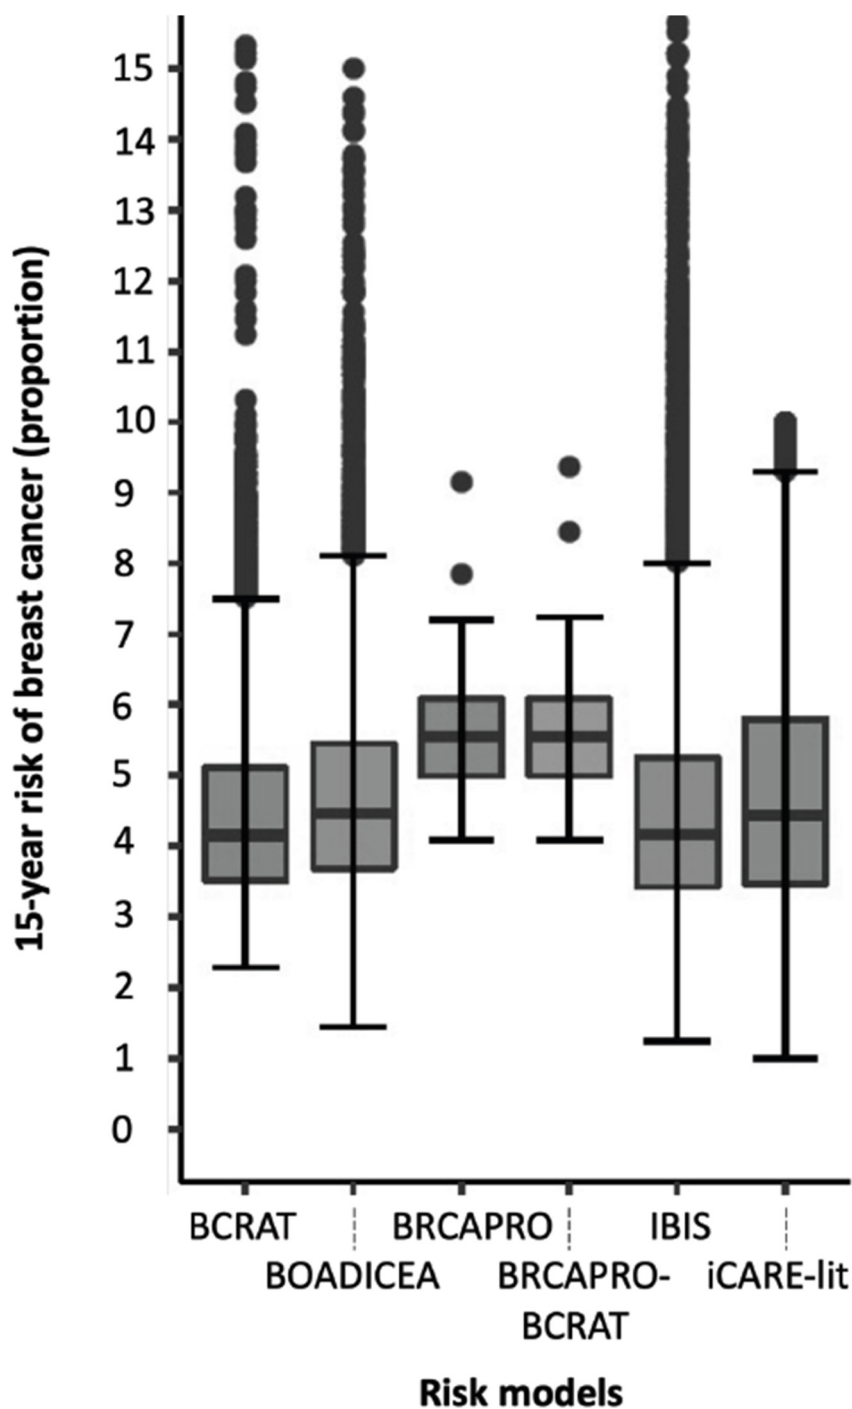

Figure S1. Boxplot of 15-year risk of breast cancer by risk prediction models.

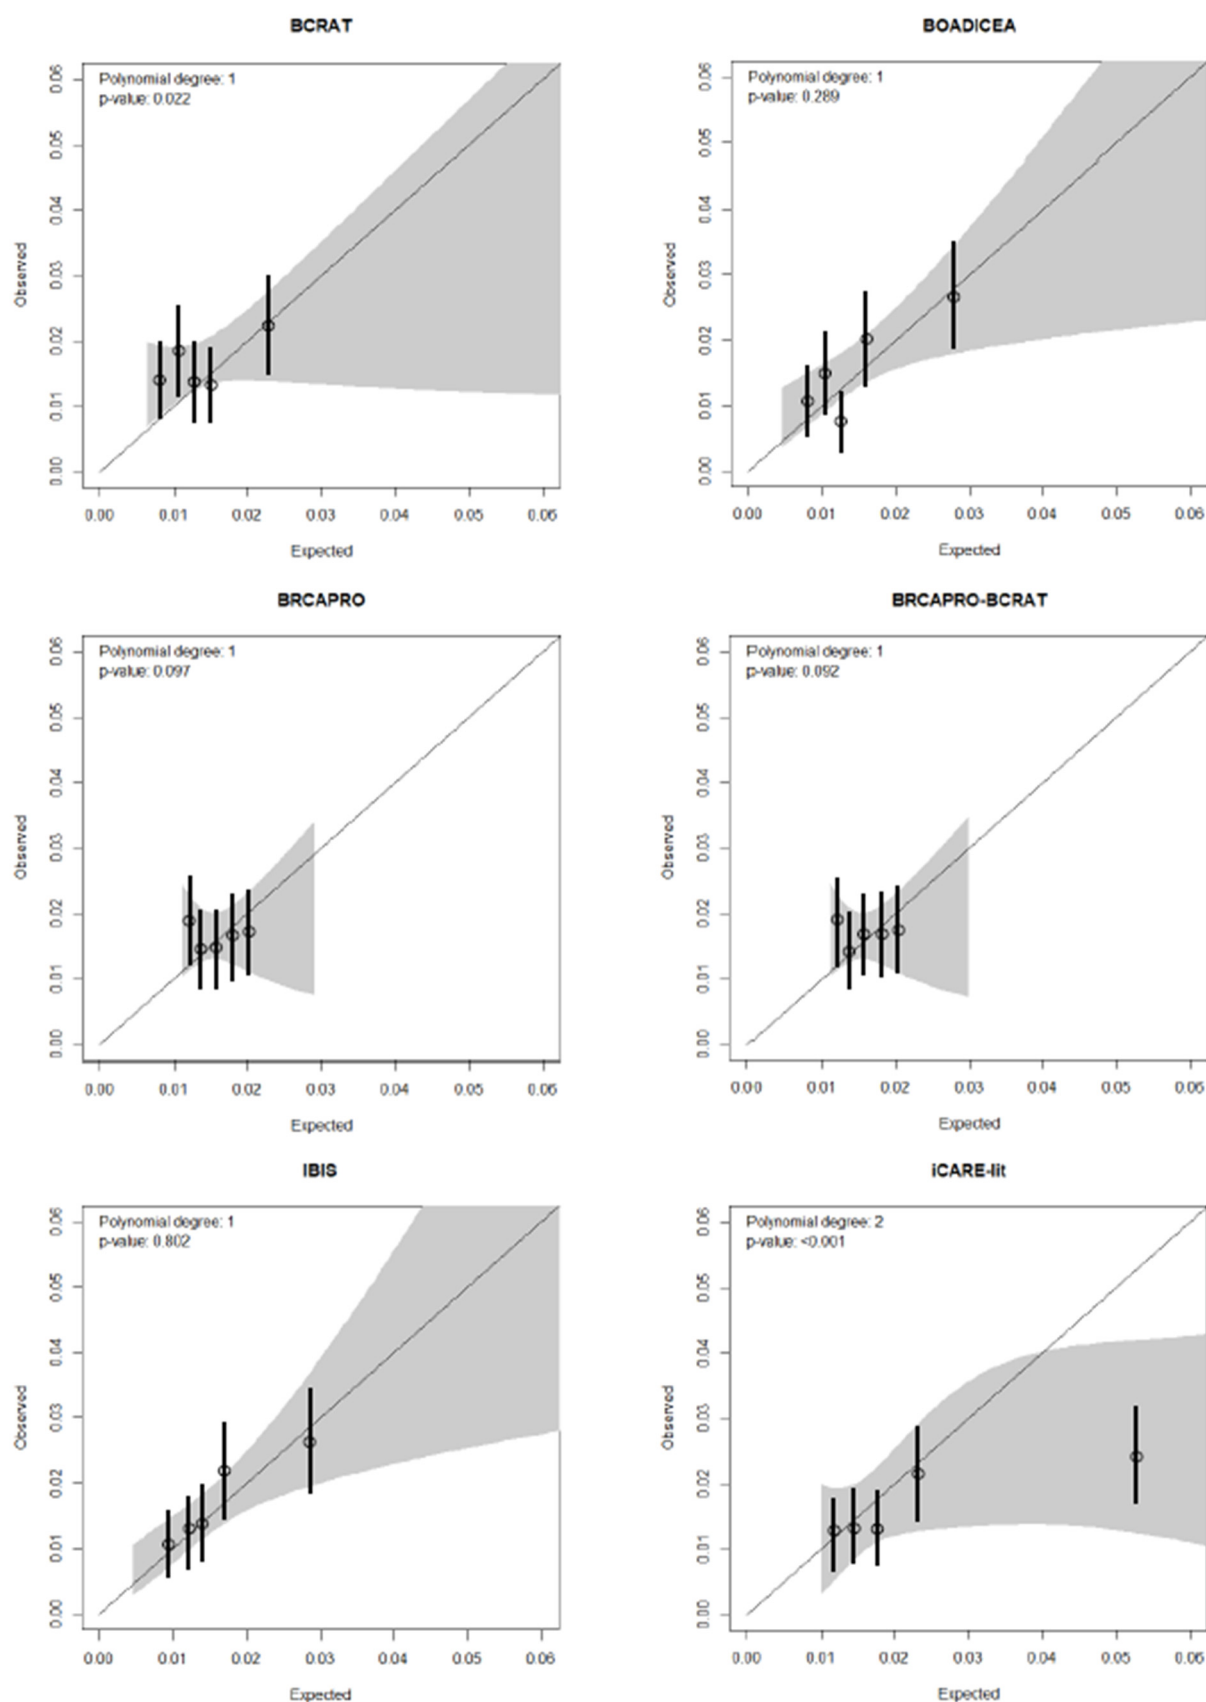

**Figure S2.** Calibration of 5-year breast cancer risk scores for six risk models across the risk spectrum.

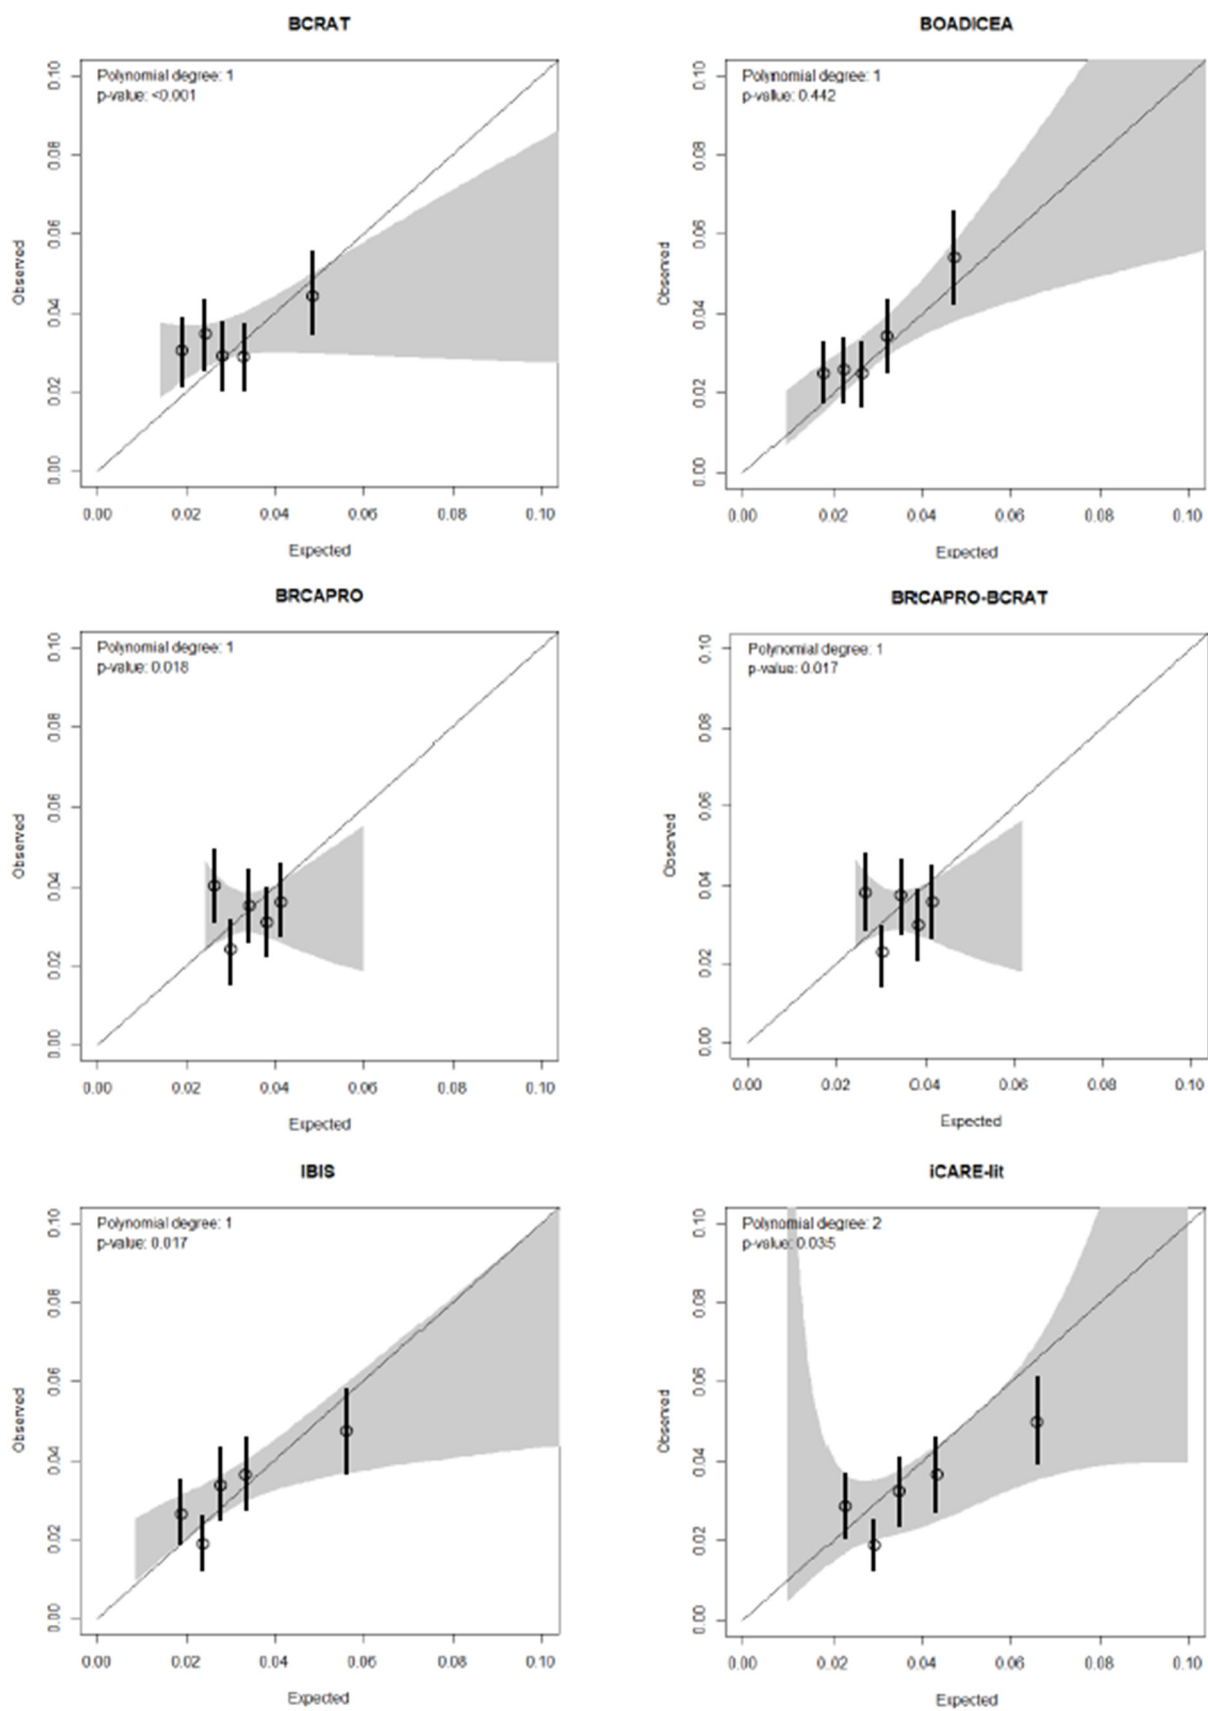

**Figure S3.** Calibration of 10-year breast cancer risk scores for six risk models across the risk spectrum.

**Table S1.** Summary of inputs for risk models and their availability within the Melbourne Collaborative Cohort Study.

| Components                                                         | IBIS                                             | BOADI-CEA                       | BRCAPRO                    | BRCAPRO-BCRAT              | BCRAT                                     | iCARE-lit                                 | Availability in MCCS |
|--------------------------------------------------------------------|--------------------------------------------------|---------------------------------|----------------------------|----------------------------|-------------------------------------------|-------------------------------------------|----------------------|
| Personal information                                               |                                                  |                                 |                            |                            |                                           |                                           |                      |
| Age                                                                | •                                                | •                               | •                          | •                          | •                                         | •                                         | •                    |
| Year of birth                                                      |                                                  | •                               |                            |                            |                                           |                                           | •                    |
| Ashkenazi Jewish heritage                                          | •                                                | •                               | •                          | •                          |                                           |                                           |                      |
| Ethnicity <sup>1</sup>                                             | •                                                | •                               | •                          | •                          | •                                         | •                                         | •                    |
| Height                                                             | •                                                | •                               |                            |                            |                                           | •                                         | •                    |
| Body mass index                                                    | •                                                | •                               |                            |                            |                                           | •                                         | •                    |
| Identical twin status                                              |                                                  | •                               | •                          | •                          |                                           |                                           |                      |
| Alcohol intake                                                     |                                                  | •                               |                            |                            |                                           | •                                         | •                    |
| Age at menarche                                                    | •                                                | •                               |                            | •                          | •                                         | •                                         | •                    |
| Number of live births                                              | •                                                | •                               |                            |                            |                                           | •                                         | •                    |
| Age at first birth                                                 | •                                                | •                               |                            | •                          | •                                         | •                                         | •                    |
| Menopausal status                                                  | •                                                | •                               |                            |                            |                                           | •                                         | •                    |
| Age at menopause                                                   |                                                  | •                               |                            |                            |                                           | •                                         | •                    |
| Oral contraceptive pill use                                        |                                                  | •                               |                            |                            |                                           | •                                         | •                    |
| Menopausal hormone therapy use                                     | •                                                | •                               |                            |                            |                                           | •                                         | •                    |
| History of hyperplasia (atypical or typical)/ benign breast cancer | •                                                |                                 |                            | •                          | •                                         | •                                         |                      |
| History of lobular carcinoma in situ                               | •                                                |                                 |                            |                            |                                           |                                           | •                    |
| Previous breast biopsy                                             | •                                                |                                 |                            | •                          | •                                         |                                           |                      |
| History of ovarian cancer                                          | •                                                | •                               |                            |                            |                                           |                                           | •                    |
| Mammographic density                                               | •                                                | •                               |                            |                            |                                           |                                           | *                    |
| BRCA1/BRCA2 mutation status                                        | •                                                | •                               | •                          | •                          |                                           |                                           | *                    |
| ATM/CHEK2/PALB2 mutation status                                    |                                                  | •                               |                            |                            |                                           |                                           |                      |
| <u>Family history</u>                                              |                                                  |                                 |                            |                            |                                           |                                           |                      |
| Breast cancer <sup>2</sup>                                         | •                                                | •                               | •                          | •                          | •                                         | •                                         | •                    |
| Contralateral breast cancer <sup>3</sup>                           | •                                                | •                               | •                          | •                          |                                           |                                           |                      |
| Ovarian cancer                                                     | •                                                | •                               | •                          | •                          |                                           |                                           |                      |
| Pancreatic cancer                                                  |                                                  | •                               |                            |                            |                                           |                                           |                      |
| Prostate cancer                                                    |                                                  | •                               |                            |                            |                                           |                                           | •                    |
| Age at cancer diagnosis                                            | •                                                | •                               | •                          | •                          |                                           |                                           | •                    |
| Underlying incidence rates                                         | UK:<br>2005-2009<br>Thames<br>Cancer<br>Registry | Australia:<br>1982-2010<br>AIHW | US: 2014-2016 SEER (White) | US: 2014-2016 SEER (White) | US:<br>White<br>1983-1987<br>SEER (White) | Australia:<br>2010-2015<br>AIHW (updated) |                      |

\* Not available for most participants eligible for this study, so these variables were not included in our analyses.

<sup>1</sup>IBIS and BOADICEA uses country-specific incidence rates of breast cancer, so they account for ethnicity indirectly.

<sup>2</sup>Breast cancer family history for IBIS and BOADICEA accounts for multigenerational history, including age of relative and diagnosis. BRCAPRO models accounts for multigenerational history, including relatives age of diagnosis and imputes missing ages.

BCRAT includes number of first-degree relatives and iCARE includes a binary presence or absence of BC in first degree relatives.

<sup>3</sup>IBIS asks for bilateral breast cancer.

IBIS: International Breast Cancer Intervention Study model (IBIS or Tyrer-Cuzick version 8b); BOADICEA: the Breast and Ovarian Analysis of Disease Incidence and Carrier Estimation Algorithm model (version 5.0.0); BRCAPRO: BayesMendel (version 2.1-7); BRCAPRO-BCRAT (version 2.1-7); BCRAT: the Breast Cancer Risk Assessment Tool (version 4.1); iCARE-lit: Individualised Coherent Absolute Risk Estimators-literature model (version 1); MCCS: Melbourne Collaborative Cohort Study; SEER: the Surveillance, Epidemiology, and End Results; AIHW: Australian Institute of Health and Welfare.

**Table S2.** Sensitivity analysis of calibration and discrimination of 15-year risks for six risk models censoring in situ breast cancer<sup>1</sup>.

| <b>Risk Model</b>                               | <b>Number of women</b> | <b>Expected number of cases</b> | <b>Observed number of cases</b> | <b>Expected/Observed ratio (95%CI)</b> | <b>Concordance statistic (95% CI)</b> |
|-------------------------------------------------|------------------------|---------------------------------|---------------------------------|----------------------------------------|---------------------------------------|
| Overall                                         |                        |                                 |                                 |                                        |                                       |
| IBIS                                            | 7608                   | 339.0                           | 351                             | 0.97 (0.87,1.07)                       | 0.57 (0.52,0.62)                      |
| BOADICEA                                        |                        | 340.8                           | 351                             | 0.97 (0.87,1.08)                       | 0.61 (0.56,0.66)                      |
| BRCAPRO                                         |                        | 387.5                           | 351                             | 1.10 (0.99,1.23)                       | 0.53 (0.47,0.59)                      |
| BRCAPRO-BCRAT                                   |                        | 387.8                           | 351                             | 1.10 (1.00,1.23)                       | 0.52 (0.47,0.58)                      |
| BCRAT                                           |                        | 326.3                           | 351                             | 0.93 (0.84,1.03)                       | 0.52 (0.46,0.57)                      |
| iCARE-lit                                       |                        | 338.0                           | 351                             | 0.96 (0.87,1.07)                       | 0.53 (0.47,0.59)                      |
| Age 50-54 years                                 | 1912                   |                                 |                                 |                                        |                                       |
| IBIS                                            |                        | 89.5                            | 91                              | 0.98 (0.80,1.21)                       | 0.59 (0.53,0.65)                      |
| BOADICEA                                        |                        | 82.6                            | 91                              | 0.91 (0.74,1.11)                       | 0.60 (0.54,0.66)                      |
| BRCAPRO                                         |                        | 82.4                            | 91                              | 0.91 (0.74,1.11)                       | 0.49 (0.43,0.55)                      |
| BRCAPRO-BCRAT                                   |                        | 82.5                            | 91                              | 0.91 (0.74,1.11)                       | 0.49 (0.43,0.55)                      |
| BCRAT                                           |                        | 75.8                            | 91                              | 0.83 (0.68,1.02)                       | 0.54 (0.48,0.60)                      |
| iCARE-lit                                       |                        | 85.4                            | 91                              | 0.94 (0.76,1.15)                       | 0.55 (0.49,0.62)                      |
| Age 55-59 years                                 | 2679                   |                                 |                                 |                                        |                                       |
| IBIS                                            |                        | 121.1                           | 116                             | 1.04 (0.87,1.25)                       | 0.56 (0.50,0.61)                      |
| BOADICEA                                        |                        | 123.5                           | 116                             | 1.06 (0.89,1.28)                       | 0.59 (0.54,0.65)                      |
| BRCAPRO                                         |                        | 134.2                           | 116                             | 1.16 (0.96,1.39)                       | 0.54 (0.49,0.59)                      |
| BRCAPRO-BCRAT                                   |                        | 134.3                           | 116                             | 1.16 (0.97,1.39)                       | 0.54 (0.49,0.59)                      |
| BCRAT                                           |                        | 114.1                           | 116                             | 0.98 (0.82,1.18)                       | 0.58 (0.52,0.63)                      |
| iCARE-lit                                       |                        | 119.7                           | 116                             | 1.03 (0.86,1.24)                       | 0.51 (0.45,0.57)                      |
| Age 60-65 years                                 | 3017                   |                                 |                                 |                                        |                                       |
| IBIS                                            |                        | 128.5                           | 144                             | 0.89 (0.76,1.05)                       | 0.58 (0.53,0.63)                      |
| BOADICEA                                        |                        | 134.7                           | 144                             | 0.94 (0.79,1.10)                       | 0.59 (0.54,0.64)                      |
| BRCAPRO                                         |                        | 171.0                           | 144                             | 1.19 (1.01,1.40)                       | 0.51 (0.46,0.56)                      |
| BRCAPRO-BCRAT                                   |                        | 171.1                           | 144                             | 1.19 (1.01,1.40)                       | 0.49 (0.44,0.54)                      |
| BCRAT                                           |                        | 136.4                           | 144                             | 0.95 (0.80,1.12)                       | 0.51 (0.46,0.56)                      |
| iCARE-lit                                       |                        | 132.9                           | 144                             | 0.92 (0.78,1.09)                       | 0.55 (0.50,0.60)                      |
| No family history of breast cancer <sup>2</sup> | 5888                   |                                 |                                 |                                        |                                       |
| IBIS                                            |                        | 215.8                           | 241                             | 0.90 (0.79,1.02)                       | 0.54 (0.50,0.58)                      |
| BOADICEA                                        |                        | 239.9                           | 241                             | 1.00 (0.88,1.13)                       | 0.56 (0.52,0.60)                      |
| BRCAPRO                                         |                        | 299.1                           | 241                             | 1.24 (1.09,1.41)                       | 0.50 (0.46,0.54)                      |
| BRCAPRO-BCRAT                                   |                        | 299.3                           | 241                             | 1.24 (1.09,1.41)                       | 0.50 (0.46,0.54)                      |
| BCRAT                                           |                        | 228.7                           | 241                             | 0.95 (0.84,1.08)                       | 0.53 (0.49,0.56)                      |
| iCARE-lit                                       |                        | 254.1                           | 241                             | 1.05 (0.93,1.20)                       | 0.52 (0.48,0.56)                      |
| Family history of breast cancer <sup>2</sup>    | 1720                   |                                 |                                 |                                        |                                       |
| IBIS                                            |                        | 123.1                           | 110                             | 1.12 (0.93,1.35)                       | 0.57 (0.52,0.62)                      |
| BOADICEA                                        |                        | 100.9                           | 110                             | 0.92 (0.76,1.11)                       | 0.60 (0.55,0.65)                      |
| BRCAPRO                                         |                        | 88.4                            | 110                             | 0.80 (0.67,0.97)                       | 0.53 (0.47,0.59)                      |
| BRCAPRO-BCRAT                                   |                        | 88.5                            | 110                             | 0.80 (0.67,0.97)                       | 0.52 (0.47,0.58)                      |
| BCRAT                                           |                        | 97.6                            | 110                             | 0.89 (0.74,1.07)                       | 0.52 (0.46,0.57)                      |
| iCARE-lit                                       |                        | 83.8                            | 110                             | 0.76 (0.63,0.92)                       | 0.53 (0.47,0.59)                      |

<sup>1</sup>Censor based on the earliest of censor date (1<sup>st</sup> March 2019, reaching 80 years of age, follow up time of 15 years or diagnosis of in situ breast cancer).

<sup>2</sup>Family history in first- or second-degree relatives

IBIS: International Breast Cancer Intervention Study model (IBIS or Tyrer-Cuzick version 8b); BOADICEA: the Breast and Ovarian Analysis of Disease Incidence and Carrier Estimation Algorithm model (version 5.0.0); BRCAPRO: BayesMendel (version 2.1-7);

BRCAPRO-BCRAT (version 2.1-7); BCRAT: the Breast Cancer Risk Assessment Tool (version 4.1); iCARE-lit: Individualised Coherent Absolute Risk Estimators-literature model (version 1)
